# Supplementary material for: Pre-exposure to non-pathogenic bacteria does not protect Drosophila against the entomopathogenic bacterium Photorhabdus
Source: PubMed Central journal article supplement (PMC6209181; doi:10.1371/journal.pone.0205256), 2018-10-31
Supplement: pone.0205256.s001.pdf [file pone.0205256.s001.pdf]

**S1 Table.** Statistical analysis of gene expression of AMPs at different stages (Figs 1B and 1C) of *Drosophila* using one-way ANOVA with Fisher's LSD comparing primed and non-primed individuals.

| Stages                                    | Comparison        | Individual P value |            |
|-------------------------------------------|-------------------|--------------------|------------|
|                                           |                   | <i>dpt-A</i>       | <i>drs</i> |
| Larvae                                    | LB vs. Ec + MI    | 0.2635             | 0.9916     |
|                                           | LB vs. HK Ec + MI | 0.1847             | 0.8993     |
| Pupae                                     | LB vs. Ec + MI    | 0.1227             | 0.9896     |
|                                           | LB vs. HK Ec + MI | 0.1972             | 0.7413     |
| Young Adult                               | LB vs. Ec + MI    | 0.1223             | 0.7164     |
|                                           | LB vs. HK Ec + MI | 0.6248             | 0.0009     |
| <b>ANOVA summary</b>                      |                   |                    |            |
| F                                         |                   | 2.06               | 6.163      |
| P value                                   |                   | 0.1097             | 0.0009     |
| P value summary                           |                   | ns                 | ***        |
| Significant diff. among means (P < 0.05)? |                   | No                 | Yes        |
| R square                                  |                   | 0.4071             | 0.649      |

*ns: not significant*
