# Supplementary material for: Pre-exposure to non-pathogenic bacteria does not protect Drosophila against the entomopathogenic bacterium Photorhabdus
Source: PubMed Central journal article supplement (PMC6209181; doi:10.1371/journal.pone.0205256), 2018-10-31
Supplement: pone.0205256.s002.pdf [file pone.0205256.s002.pdf]

**S2 Table.** Statistical analysis of gene expression of AMPs at different stages (Figs 1B and 1C) of *Drosophila* using one-way ANOVA with Fisher's LSD comparing live and heat-killed bacteria treatments.

| Stages                                    | Comparison            | Individual P value |            |
|-------------------------------------------|-----------------------|--------------------|------------|
|                                           |                       | <i>dpt-A</i>       | <i>drs</i> |
| Larvae                                    | Ec + MI vs HK Ec + MI | 0.8347             | 0.8967     |
| Pupae                                     |                       | 0.7946             | 0.7451     |
| Young Adult                               |                       | 0.0368             | 0.0045     |
| ANOVA summary                             |                       |                    |            |
| F                                         |                       | 1.979              | 6.126      |
| P value                                   |                       | 0.1369             | 0.0018     |
| P value summary                           |                       | ns                 | **         |
| Significant diff. among means (P < 0.05)? |                       | No                 | Yes        |
| R square                                  |                       | 0.3821             | 0.6299     |

*ns: not significant*
