# Supplementary material for: Pre-exposure to non-pathogenic bacteria does not protect Drosophila against the entomopathogenic bacterium Photorhabdus
Source: PubMed Central journal article supplement (PMC6209181; doi:10.1371/journal.pone.0205256), 2018-10-31
Supplement: pone.0205256.s003.pdf [file pone.0205256.s003.pdf]

**S3 Table.** Statistical analysis of gene expression of AMPs primed by non-pathogenic bacteria (Fig 3).

| Gene                            | Species   | Hours                           | Comparison                      | P-value                                   | ANOVA summary |       |                                           |         |
|---------------------------------|-----------|---------------------------------|---------------------------------|-------------------------------------------|---------------|-------|-------------------------------------------|---------|
| Diptericin-A                    | <i>Ec</i> | 0                               | LB vs. <i>Ec</i> + <i>MI</i>    | 0.6175                                    | F             | 1.435 |                                           |         |
|                                 |           |                                 | LB vs. HK <i>Ec</i> + <i>MI</i> | 0.5522                                    |               |       |                                           |         |
|                                 |           | 6                               | LB vs. <i>Ec</i> + <i>MI</i>    | 0.3707                                    |               |       | P value                                   | 0.252   |
|                                 |           |                                 | LB vs. HK <i>Ec</i> + <i>MI</i> | 0.7986                                    |               |       | P value summary                           | ns      |
|                                 |           | 24                              | LB vs. <i>Ec</i> + <i>MI</i>    | 0.0658                                    |               |       | Significant diff. among means (P < 0.05)? | No      |
|                                 |           |                                 | LB vs. HK <i>Ec</i> + <i>MI</i> | 0.0208                                    |               |       | R square                                  | 0.4031  |
|                                 | <i>Pl</i> | 0                               | LB vs. <i>Ec</i> + <i>MI</i>    | 0.7838                                    | F             | 2.931 |                                           |         |
|                                 |           |                                 | LB vs. HK <i>Ec</i> + <i>MI</i> | 0.9657                                    |               |       |                                           |         |
|                                 |           | 6                               | LB vs. <i>Ec</i> + <i>MI</i>    | 0.9689                                    |               |       | P value                                   | 0.0347  |
|                                 |           |                                 | LB vs. HK <i>Ec</i> + <i>MI</i> | 0.9568                                    |               |       | P value summary                           | *       |
|                                 |           | 24                              | LB vs. <i>Ec</i> + <i>MI</i>    | 0.0218                                    |               |       | Significant diff. among means (P < 0.05)? | Yes     |
|                                 |           |                                 | LB vs. HK <i>Ec</i> + <i>MI</i> | 0.0083                                    |               |       | R square                                  | 0.6099  |
|                                 | <i>Pa</i> | 0                               | LB vs. <i>Ec</i> + <i>MI</i>    | 0.8972                                    | F             | 10.84 |                                           |         |
|                                 |           |                                 | LB vs. HK <i>Ec</i> + <i>MI</i> | 0.9263                                    |               |       |                                           |         |
|                                 |           | 6                               | LB vs. <i>Ec</i> + <i>MI</i>    | 0.9705                                    |               |       | P value                                   | <0.0001 |
| LB vs. HK <i>Ec</i> + <i>MI</i> |           |                                 | 0.9098                          | P value summary                           |               |       | ****                                      |         |
| 24                              |           | LB vs. <i>Ec</i> + <i>MI</i>    | <0.0001                         | Significant diff. among means (P < 0.05)? |               |       | Yes                                       |         |
|                                 |           | LB vs. HK <i>Ec</i> + <i>MI</i> | 0.0009                          | R square                                  |               |       | 0.8525                                    |         |
| Drosomycin                      | <i>Ec</i> | 0                               | LB vs. <i>Ec</i> + <i>MI</i>    | 0.1527                                    | F             | 1.991 |                                           |         |
|                                 |           |                                 | LB vs. HK <i>Ec</i> + <i>MI</i> | 0.2586                                    |               |       |                                           |         |
|                                 |           | 6                               | LB vs. <i>Ec</i> + <i>MI</i>    | 0.7945                                    |               |       | P value                                   | 0.1073  |
|                                 |           |                                 | LB vs. HK <i>Ec</i> + <i>MI</i> | 0.1729                                    |               |       | P value summary                           | ns      |
|                                 |           | 24                              | LB vs. <i>Ec</i> + <i>MI</i>    | 0.0423                                    |               |       | Significant diff. among means (P < 0.05)? | No      |
|                                 |           |                                 | LB vs. HK <i>Ec</i> + <i>MI</i> | 0.009                                     |               |       | R square                                  | 0.4695  |
|                                 | <i>Pl</i> | 0                               | LB vs. <i>Ec</i> + <i>MI</i>    | 0.5675                                    | F             | 2.945 |                                           |         |
|                                 |           |                                 | LB vs. HK <i>Ec</i> + <i>MI</i> | 0.3189                                    |               |       |                                           |         |
|                                 |           | 6                               | LB vs. <i>Ec</i> + <i>MI</i>    | 0.6849                                    |               |       | P value                                   | 0.0341  |
|                                 |           |                                 | LB vs. HK <i>Ec</i> + <i>MI</i> | 0.9758                                    |               |       | P value summary                           | *       |
|                                 |           | 24                              | LB vs. <i>Ec</i> + <i>MI</i>    | 0.0089                                    |               |       | Significant diff. among means (P < 0.05)? | Yes     |
|                                 |           |                                 | LB vs. HK <i>Ec</i> + <i>MI</i> | 0.9249                                    |               |       | R square                                  | 0.611   |
|                                 | <i>Pa</i> | 0                               | LB vs. <i>Ec</i> + <i>MI</i>    | 0.6532                                    | F             | 4.317 |                                           |         |
|                                 |           |                                 | LB vs. HK <i>Ec</i> + <i>MI</i> | 0.4563                                    |               |       |                                           |         |
|                                 |           | 6                               | LB vs. <i>Ec</i> + <i>MI</i>    | 0.9623                                    |               |       | P value                                   | 0.0054  |
| LB vs. HK <i>Ec</i> + <i>MI</i> |           |                                 | 0.8202                          | P value summary                           |               |       | **                                        |         |
| 24                              |           | LB vs. <i>Ec</i> + <i>MI</i>    | 0.001                           | Significant diff. among means (P < 0.05)? |               |       | Yes                                       |         |
|                                 |           | LB vs. HK <i>Ec</i> + <i>MI</i> | 0.8682                          | R square                                  |               |       | 0.6701                                    |         |

ns: not significant
