# Supplementary material for: Pre-exposure to non-pathogenic bacteria does not protect Drosophila against the entomopathogenic bacterium Photorhabdus
Source: PubMed Central journal article supplement (PMC6209181; doi:10.1371/journal.pone.0205256), 2018-10-31
Supplement: pone.0205256.s004.pdf [file pone.0205256.s004.pdf]

**S4 Table.** Statistical analysis of the survival graphs.

| Log-rank (Mantel-Cox) test             | Fig 1D | Fig 4  |           |           |           | Fig 5  |           |           |           |
|----------------------------------------|--------|--------|-----------|-----------|-----------|--------|-----------|-----------|-----------|
|                                        |        | PBS    | <i>Ec</i> | <i>PI</i> | <i>Pa</i> | PBS    | <i>Ec</i> | <i>PI</i> | <i>Pa</i> |
| Chi square                             | 3.028  | 2.3    | 0.4495    | 6.16      | 2.207     | 1.401  | 1.238     | 0.9581    | 0.2254    |
| df                                     | 3      | 3      | 3         | 3         | 3         | 3      | 3         | 3         | 3         |
| P value                                | 0.3873 | 0.5126 | 0.9298    | 0.1041    | 0.5305    | 0.7054 | 0.7439    | 0.8114    | 0.9734    |
| P value summary                        | ns     | ns     | ns        | ns        | ns        | ns     | ns        | ns        | ns        |
| Are the survival curves sig different? | No     | No     | No        | No        | No        | No     | No        | No        | No        |

*ns: not significant*
